# Supplementary material
Source: publisher site journal article supplement (https://www.degruyterbrill.com/publication/dbid/dllo/downloadAsset/DLLO_DLLO%20Titelliste.pdf)
Supplement: Supplementary file 1 [file DLLO_DLLO%20Titelliste.pdf]

## Deutsches Literatur-Lexikon. Das 20. Jahrhundert

| Band                         | Titel                                            | Herausgeber           | ISBN              | Erscheinungsdatum der Printausgabe |
|------------------------------|--------------------------------------------------|-----------------------|-------------------|------------------------------------|
| 1: Aab - Bauer               | Deutsches Literatur-Lexikon. Das 20. Jahrhundert | Lang, Carl Ludwig     | 978-3-908255-01-7 | 20.12.1999                         |
| 2: Bauer-Ose - Björnson      | Deutsches Literatur-Lexikon. Das 20. Jahrhundert | Feilchenfeldt, Konrad | 978-3-908255-02-4 | 13.12.2000                         |
| 3: Blaas - Braunfels         | Deutsches Literatur-Lexikon. Das 20. Jahrhundert | Feilchenfeldt, Konrad | 978-3-908255-03-1 | 07.12.2001                         |
| 4: Braungart - Busta         | Deutsches Literatur-Lexikon. Das 20. Jahrhundert | Feilchenfeldt, Konrad | 978-3-908255-04-8 | 12.12.2002                         |
| 5: Butenschön - Dedo         | Deutsches Literatur-Lexikon. Das 20. Jahrhundert | Feilchenfeldt, Konrad | 978-3-908255-05-5 | 03.12.2003                         |
| 6: Deeg - Dürrenfeld         | Deutsches Literatur-Lexikon. Das 20. Jahrhundert | Feilchenfeldt, Konrad | 978-3-908255-06-2 | 25.05.2004                         |
| 7: Dürrenmatt - Ernestus     | Deutsches Literatur-Lexikon. Das 20. Jahrhundert | Feilchenfeldt, Konrad | 978-3-908255-07-9 | 23.02.2005                         |
| 8: Erni - Fischer            | Deutsches Literatur-Lexikon. Das 20. Jahrhundert | Feilchenfeldt, Konrad | 978-3-908255-08-6 | 23.11.2005                         |
| 9: Fischer-Abendroth - Fries | Deutsches Literatur-Lexikon. Das 20. Jahrhundert | Feilchenfeldt, Konrad | 978-3-908255-09-3 | 15.08.2006                         |
| 10: Fries - Gellert          | Deutsches Literatur-Lexikon. Das 20. Jahrhundert | Feilchenfeldt, Konrad | 978-3-908255-10-9 | 22.05.2007                         |
| 11: Gellert - Gorski         | Deutsches Literatur-Lexikon. Das 20. Jahrhundert | Feilchenfeldt, Konrad | 978-3-908255-11-6 | 27.02.2008                         |
| 12: Gorsleben - Grunenberg   | Deutsches Literatur-Lexikon. Das 20. Jahrhundert | Feilchenfeldt, Konrad | 978-3-908255-12-3 | 27.11.2008                         |
| 13: Grunenberg - Hallwig     | Deutsches Literatur-Lexikon. Das 20. Jahrhundert | Feilchenfeldt, Konrad | 978-3-908255-13-0 | 28.08.2009                         |
| 14: Halm - Hauptmann         | Deutsches Literatur-Lexikon. Das 20. Jahrhundert | Feilchenfeldt, Konrad | 978-3-11-023160-1 | 16.07.2010                         |
| 15: Hauptmann - Heinemann    | Deutsches Literatur-Lexikon. Das 20. Jahrhundert | Hagedstedt, Lutz      | 978-3-11-023161-8 | 26.11.2010                         |
| 16: Heinemann - Henz         | Deutsches Literatur-Lexikon. Das 20. Jahrhundert | Hagedstedt, Lutz      | 978-3-11-023162-5 | 27.05.2011                         |
| 17: Henze - Hettwer          | Deutsches Literatur-Lexikon. Das 20. Jahrhundert | Hagedstedt, Lutz      | 978-3-11-023163-2 | 17.11.2011                         |
| 18: Hetz - Hix               | Deutsches Literatur-Lexikon. Das 20. Jahrhundert | Hagedstedt, Lutz      | 978-3-11-023164-9 | 29.05.2012                         |
| 19: Hladej - Hohlbein        | Deutsches Literatur-Lexikon. Das 20. Jahrhundert | Hagedstedt, Lutz      | 978-3-11-023165-6 | 15.11.2012                         |
| 20: Hohler - Hubensteiner    | Deutsches Literatur-Lexikon. Das 20. Jahrhundert | Hagedstedt, Lutz      | 978-3-11-023166-3 | 21.05.2013                         |
| 21: Huber - Imgrund          | Deutsches Literatur-Lexikon. Das 20. Jahrhundert | Hagedstedt, Lutz      | 978-3-11-023167-0 | 15.11.2013                         |
| 22: Imhasly - Jann           | Deutsches Literatur-Lexikon. Das 20. Jahrhundert | Hagedstedt, Lutz      | 978-3-11-023168-7 | 13.05.2014                         |
| 23: Jannack . Jonigk         | Deutsches Literatur-Lexikon. Das 20. Jahrhundert | Hagedstedt, Lutz      | 978-3-11-023169-4 | 13.10.2014                         |
| 24: Jonke - Kafitz           | Deutsches Literatur-Lexikon. Das 20. Jahrhundert | Hagedstedt, Lutz      | 978-3-11-023170-0 | 19.05.2015                         |
| 25: Kafka - Karnein          | Deutsches Literatur-Lexikon. Das 20. Jahrhundert | Hagedstedt, Lutz      | 978-3-11-040434-0 | 13.11.2015                         |

|                                    |                                                  |                |                   |                      |
|------------------------------------|--------------------------------------------------|----------------|-------------------|----------------------|
| 26: Karner - Kelter                | Deutsches Literatur-Lexikon. Das 20. Jahrhundert | Hagededt, Lutz | 978-3-11-045295-2 | 24.05.2016           |
| 27: Kelterborn - Kippenberger      | Deutsches Literatur-Lexikon. Das 20. Jahrhundert | Hagededt, Lutz | 978-3-11-045298-3 | 21.11.2016           |
| 28: Kipper – Klieneberger-Nobel    | Deutsches Literatur-Lexikon. Das 20. Jahrhundert | Hagededt, Lutz | 978-3-11-051648-7 | 22.05.2017           |
| 29: Klabund / Klier – Koch, Julius | Deutsches Literatur-Lexikon. Das 20. Jahrhundert | Hagededt, Lutz | 978-3-11-051653-1 | 23.11.2017           |
| 30: Koch, Jurij - Kokontis         | Deutsches Literatur-Lexikon. Das 20. Jahrhundert | Hagededt, Lutz | 978-3-11-057704-4 | 22.05.2018           |
| 31: Kokoschka - Krämer             | Deutsches Literatur-Lexikon. Das 20. Jahrhundert | Hagededt, Lutz | 978-3-11-057707-5 | 19.11.2018           |
| 32: Krämer-Badoni - Kriegelstein   | Deutsches Literatur-Lexikon. Das 20. Jahrhundert | Hagededt, Lutz | 978-3-11-063190-6 | 20.05.2019           |
| 33: Krieger - Kuenster             | Deutsches Literatur-Lexikon. Das 20. Jahrhundert | Hagededt, Lutz | 978-3-11-063192-0 | 18.11.2019           |
| 34: Künzel - Landau                | Deutsches Literatur-Lexikon. Das 20. Jahrhundert | Hagededt, Lutz | 978-3-11-067766-9 | 18.05.2020           |
| 35: Landauer - Lehfeldt            | Deutsches Literatur-Lexikon. Das 20. Jahrhundert | Hagededt, Lutz | 978-3-11-067767-6 | 23.11.2020           |
| 36: Lehmann - Lichtenberg          | Deutsches Literatur-Lexikon. Das 20. Jahrhundert | Hagededt, Lutz | 978-3-11-070506-5 | 25.05.2021           |
| 37: Lichtenberger - Löw            | Deutsches Literatur-Lexikon. Das 20. Jahrhundert | Hagededt, Lutz | 978-3-11-070509-6 | 21.11.2021           |
| 38: Loewe - Luttmer                | Deutsches Literatur-Lexikon. Das 20. Jahrhundert | Hagededt, Lutz | 978-3-11-076095-8 | 07.06.2022           |
| 39: Lutz - Mansfeld                | Deutsches Literatur-Lexikon. Das 20. Jahrhundert | Hagededt, Lutz | 978-3-11-076096-5 | 21.11.2022           |
| 40: Mansion - Mehl                 | Deutsches Literatur-Lexikon. Das 20. Jahrhundert | Hagededt, Lutz | 978-3-11-100542-3 | 19.06.2023           |
| 41: Mehler – Miller                | Deutsches Literatur-Lexikon. Das 20. Jahrhundert | Hagededt, Lutz | 978-3-11-100679-6 | 20.11.2023           |
| 42: Mimo - Müller, Gert            | Deutsches Literatur-Lexikon. Das 20. Jahrhundert | Hagededt, Lutz | 978-3-11-131486-0 | 17.06.2024 (geplant) |

## Deutsches Literatur-Lexikon. 3. Ausgabe

| Band                       | Titel                                   | Herausgeber                                    | ISBN              | Erscheinungsdatum der Printausgabe |
|----------------------------|-----------------------------------------|------------------------------------------------|-------------------|------------------------------------|
| 1: Aal - Bremeneck         | Deutsches Literatur-Lexikon. 3. Ausgabe | Berger, Bruno; Rupp, Heinz                     | 978-3-907820-01-8 | 01.01.1968                         |
| 2: Bremer - Davidis        | Deutsches Literatur-Lexikon. 3. Ausgabe | Berger, Bruno; Rupp, Heinz                     | 978-3-907820-02-5 | 01.01.1969                         |
| 3: Davidis - Eichendorff   | Deutsches Literatur-Lexikon. 3. Ausgabe | Berger, Bruno; Rupp, Heinz                     | 978-3-907820-03-2 | 01.01.1971                         |
| 4: Eichendorst - Filchner  | Deutsches Literatur-Lexikon. 3. Ausgabe | Rupp, Heinz; Gaede, Friedrich; Steffen, Detlev | 978-3-907820-04-9 | 01.01.1972                         |
| 5: Filek - Fux             | Deutsches Literatur-Lexikon. 3. Ausgabe | Rupp, Heinz; Emmel, Hidegard                   | 978-3-907820-05-6 | 01.01.1978                         |
| 6: Gaa - Gysin             | Deutsches Literatur-Lexikon. 3. Ausgabe | Rupp, Heinz; Lang, Carl Ludwig                 | 978-3-907820-06-3 | 01.01.1978                         |
| 7: Haab - Hogrefe          | Deutsches Literatur-Lexikon. 3. Ausgabe | Rupp, Heinz; Lang, Carl Ludwig                 | 978-3-907820-07-0 | 01.01.1979                         |
| 8: Hohberg - Kober         | Deutsches Literatur-Lexikon. 3. Ausgabe | Rupp, Heinz; Lang, Carl Ludwig                 | 978-3-907820-08-7 | 01.01.1981                         |
| 9: Kober - Lucidarius      | Deutsches Literatur-Lexikon. 3. Ausgabe | Rupp, Heinz; Lang, Carl Ludwig                 | 978-3-907820-09-4 | 01.01.1984                         |
| 10: Lucius - Myß           | Deutsches Literatur-Lexikon. 3. Ausgabe | Rupp, Heinz; Lang, Carl Ludwig                 | 978-3-907820-10-0 | 01.01.1986                         |
| 11: Naaf - Pixner          | Deutsches Literatur-Lexikon. 3. Ausgabe | Rupp, Heinz; Lang, Carl Ludwig                 | 978-3-907820-11-7 | 01.01.1988                         |
| 12: Plachetka - Rilke      | Deutsches Literatur-Lexikon. 3. Ausgabe | Rupp, Heinz; Lang, Carl Ludwig                 | 978-3-907820-12-4 | 01.01.1990                         |
| 13: Rill - Salzmann        | Deutsches Literatur-Lexikon. 3. Ausgabe | Rupp, Heinz; Lang, Carl Ludwig                 | 978-3-907820-13-1 | 01.01.1991                         |
| 14: Salzmesser - Schilling | Deutsches Literatur-Lexikon. 3. Ausgabe | Rupp, Heinz; Lang, Carl Ludwig                 | 978-3-907820-14-8 | 13.03.1992                         |
| 15: Schilling - Schnydrig  | Deutsches Literatur-Lexikon. 3. Ausgabe | Rupp, Heinz; Lang, Carl Ludwig                 | 978-3-907820-15-5 | 11.03.1993                         |
| 16: Schoebel - Schwaiger   | Deutsches Literatur-Lexikon. 3. Ausgabe | Herkommer, Hubert; Lang, Carl Ludwig           | 978-3-907820-18-6 | 23.11.1995                         |
| 17: Schwalb - Siewert      | Deutsches Literatur-Lexikon. 3. Ausgabe | Herkommer, Hubert; Lang, Carl Ludwig           | 978-3-907820-20-9 | 25.11.1997                         |
| 18: Siff - Spoerri         | Deutsches Literatur-Lexikon. 3. Ausgabe | Herkommer, Hubert; Lang, Carl Ludwig           | 978-3-907820-23-0 | 24.11.1998                         |
| 19: Spohn - Sternaux       | Deutsches Literatur-Lexikon. 3. Ausgabe | Herkommer, Hubert; Lang, Carl Ludwig           | 978-3-907820-24-7 | 25.11.1999                         |
| 20: Sternbach - Streißler  | Deutsches Literatur-Lexikon. 3. Ausgabe | Herkommer, Hubert; Feilchenfeldt, Konrad       | 978-3-907820-25-4 | 24.11.2000                         |

|                           |                                         |                                                                                                 |                   |            |
|---------------------------|-----------------------------------------|-------------------------------------------------------------------------------------------------|-------------------|------------|
| 21: Streit - Techim       | Deutsches Literatur-Lexikon. 3. Ausgabe | Herkommer, Hubert;<br>Feilchenfeldt, Konrad                                                     | 978-3-908255-21-5 | 14.11.2001 |
| 22: Tecklenburg - Tilisch | Deutsches Literatur-Lexikon. 3. Ausgabe | Herkommer, Hubert;<br>Feilchenfeldt, Konrad                                                     | 978-3-908255-22-2 | 18.11.2002 |
| 23: Tilka - Trystedt      | Deutsches Literatur-Lexikon. 3. Ausgabe | Herkommer, Hubert;<br>Feilchenfeldt, Konrad                                                     | 978-3-908255-23-9 | 17.11.2003 |
| 24: Tsakiridis - Ursinus  | Deutsches Literatur-Lexikon. 3. Ausgabe | Herkommer, Hubert;<br>Feilchenfeldt, Konrad                                                     | 978-3-908255-24-6 | 18.11.2004 |
| 25: Ursprung - Vöhringer  | Deutsches Literatur-Lexikon. 3. Ausgabe | Herkommer, Hubert;<br>Feilchenfeldt, Konrad                                                     | 978-3-908255-25-3 | 23.11.2005 |
| 26: Völckel - Wagner      | Deutsches Literatur-Lexikon. 3. Ausgabe | Herkommer, Hubert;<br>Feilchenfeldt, Konrad                                                     | 978-3-908255-26-0 | 23.11.2006 |
| 27: Wagner - Walser       | Deutsches Literatur-Lexikon. 3. Ausgabe | Herkommer, Hubert;<br>Feilchenfeldt, Konrad                                                     | 978-3-908255-27-7 | 20.11.2007 |
| 28: Walsh - Wedegärtner   | Deutsches Literatur-Lexikon. 3. Ausgabe | Herkommer, Hubert;<br>Feilchenfeldt, Konrad                                                     | 978-3-908255-43-7 | 27.11.2008 |
| 29: Wedekind - Weiss      | Deutsches Literatur-Lexikon. 3. Ausgabe | Herkommer, Hubert;<br>Feilchenfeldt, Konrad                                                     | 978-3-908255-44-4 | 27.11.2009 |
| 30: Weiss - Werdum        | Deutsches Literatur-Lexikon. 3. Ausgabe | Achnitz, Wolfgang; Hagedstedt, Lutz;<br>Müller, Mario; Ort, Claus-Michael;<br>Sdzuj, Reimund B. | 978-3-11-023159-5 | 26.11.2010 |
| 31: Werenberg - Wiedling  | Deutsches Literatur-Lexikon. 3. Ausgabe | Achnitz, Wolfgang; Hagedstedt, Lutz;<br>Müller, Mario; Ort, Claus-Michael;<br>Sdzuj, Reimund B. | 978-3-11-023571-5 | 22.12.2011 |
| 32: Wiedmann - Willisen   | Deutsches Literatur-Lexikon. 3. Ausgabe | Achnitz, Wolfgang; Hagedstedt, Lutz;<br>Müller, Mario; Ort, Claus-Michael;<br>Sdzuj, Reimund B. | 978-3-11-027509-4 | 28.11.2012 |
| 33: Willius - Wircker     | Deutsches Literatur-Lexikon. 3. Ausgabe | Achnitz, Wolfgang; Hagedstedt, Lutz;<br>Müller, Mario; Ort, Claus-Michael;<br>Sdzuj, Reimund B. | 978-3-11-030462-6 | 18.12.2013 |
| 34: Wirdig - Wolenber     | Deutsches Literatur-Lexikon. 3. Ausgabe | Achnitz, Wolfgang; Hagedstedt, Lutz;<br>Müller, Mario; Ort, Claus-Michael;<br>Sdzuj, Reimund B. | 978-3-11-033603-0 | 26.11.2014 |

|                    |                                         |                                                                                                 |                   |            |
|--------------------|-----------------------------------------|-------------------------------------------------------------------------------------------------|-------------------|------------|
| 35: Wolf - Worbs   | Deutsches Literatur-Lexikon. 3. Ausgabe | Achnitz, Wolfgang; Hagedstedt, Lutz;<br>Müller, Mario; Ort, Claus-Michael;<br>Sdzuj, Reimund B. | 978-3-11-033604-7 | 13.11.2015 |
| 36: Worch - Zasius | Deutsches Literatur-Lexikon. 3. Ausgabe | Achnitz, Wolfgang; Hagedstedt, Lutz;<br>Müller, Mario; Ort, Claus-Michael;<br>Sdzuj, Reimund B. | 978-3-11-036192-6 | 21.11.2016 |
| 37: Zass - Zimdar  | Deutsches Literatur-Lexikon. 3. Ausgabe | Achnitz, Wolfgang; Hagedstedt, Lutz;<br>Müller, Mario; Ort, Claus-Michael;<br>Sdzuj, Reimund B. | 978-3-11-047699-6 | 23.11.2017 |
| 38: Zimmer - Zyrl  | Deutsches Literatur-Lexikon. 3. Ausgabe | Achnitz, Wolfgang; Hagedstedt, Lutz;<br>Müller, Mario; Ort, Claus-Michael;<br>Sdzuj, Reimund B. | 978-3-11-056887-5 | 17.12.2018 |

|                                           |                                         |                                         |                   |            |
|-------------------------------------------|-----------------------------------------|-----------------------------------------|-------------------|------------|
| Ergänzungsband 1:<br>A - Bernfeld         | Deutsches Literatur-Lexikon. 3. Ausgabe | Rupp, Heinz; Lang, Carl Ludwig          | 978-3-907820-16-2 | 24.02.1994 |
| Ergänzungsband 2:<br>Bernfeld - Christen  | Deutsches Literatur-Lexikon. 3. Ausgabe | Rupp, Heinz; Lang, Carl Ludwig          | 978-3-907820-17-9 | 14.11.1994 |
| Ergänzungsband 3:<br>Christener - Fowelin | Deutsches Literatur-Lexikon. 3. Ausgabe | Herkommer, Hubert;<br>Lang, Carl Ludwig | 978-3-907820-19-3 | 18.11.1996 |
| Ergänzungsband 4:<br>Fraenkel - Hermann   | Deutsches Literatur-Lexikon. 3. Ausgabe | Herkommer, Hubert;<br>Lang, Carl Ludwig | 978-3-907820-21-6 | 17.12.1996 |
| Ergänzungsband 5:<br>Hermann - Lyser      | Deutsches Literatur-Lexikon. 3. Ausgabe | Herkommer, Hubert;<br>Lang, Carl Ludwig | 978-3-907820-22-3 | 10.12.1997 |
| Ergänzungsband 6:<br>Maag - Ryslavy       | Deutsches Literatur-Lexikon. 3. Ausgabe | Herkommer, Hubert;<br>Lang, Carl Ludwig | 978-3-907820-76-6 | 12.12.1998 |

|                        |                                         |                                                                                                 |                   |            |
|------------------------|-----------------------------------------|-------------------------------------------------------------------------------------------------|-------------------|------------|
| Nachtragsband 1: A - E | Deutsches Literatur-Lexikon. 3. Ausgabe | Achnitz, Wolfgang; Hagedstedt, Lutz;<br>Müller, Mario; Ort, Claus-Michael;<br>Sdzuj, Reimund B. | 978-3-11-063218-7 | 19.12.2019 |
| Nachtragsband 2: F - M | Deutsches Literatur-Lexikon. 3. Ausgabe | Achnitz, Wolfgang; Hagedstedt, Lutz;<br>Müller, Mario; Ort, Claus-Michael;<br>Sdzuj, Reimund B. | 978-3-11-067790-4 | 23.11.2020 |
| Nachtragsband 3: N - Z | Deutsches Literatur-Lexikon. 3. Ausgabe | Achnitz, Wolfgang; Hagedstedt, Lutz;<br>Müller, Mario; Ort, Claus-Michael;<br>Sdzuj, Reimund B. | 978-3-11-072691-6 | 25.11.2021 |

## Deutsches Literatur-Lexikon. Das Mittelalter

| Band | Titel                                                                                                     | Untertitel                                                                        | Herausgeber       | ISBN              | Erscheinungs-<br>datum der<br>Printausgabe |
|------|-----------------------------------------------------------------------------------------------------------|-----------------------------------------------------------------------------------|-------------------|-------------------|--------------------------------------------|
| 1    | Deutsches Literatur-Lexikon.<br>Das Mittelalter.<br>Autoren und Werke nach<br>Themenkreisen und Gattungen | Das geistliche Schrifttum von den Anfängen bis zum<br>Beginn des 14. Jahrhunderts | Achnitz, Wolfgang | 978-3-598-24991-4 | 21.12.2010                                 |
| 2    | Deutsches Literatur-Lexikon.<br>Das Mittelalter.<br>Autoren und Werke nach<br>Themenkreisen und Gattungen | Das geistliche Schrifttum des Spätmittelalters                                    | Achnitz, Wolfgang | 978-3-598-24994-5 | 29.06.2011                                 |
| 3    | Deutsches Literatur-Lexikon.<br>Das Mittelalter.<br>Autoren und Werke nach<br>Themenkreisen und Gattungen | Reiseberichte und Geschichtsdichtung                                              | Achnitz, Wolfgang | 978-3-598-24992-1 | 27.12.2011                                 |
| 4    | Deutsches Literatur-Lexikon.<br>Das Mittelalter.<br>Autoren und Werke nach<br>Themenkreisen und Gattungen | Lyrik (Minnesang - Sangspruch - Meistergesang) und<br>Dramatik                    | Achnitz, Wolfgang | 978-3-598-24993-8 | 28.06.2012                                 |
| 5    | Deutsches Literatur-Lexikon.<br>Das Mittelalter.<br>Autoren und Werke nach<br>Themenkreisen und Gattungen | Epik (Vers - Strophe - Prosa), und Kleinformen                                    | Achnitz, Wolfgang | 978-3-598-24995-2 | 21.05.2013                                 |

|   |                                                                                                           |                                                                            |                   |                   |            |
|---|-----------------------------------------------------------------------------------------------------------|----------------------------------------------------------------------------|-------------------|-------------------|------------|
| 6 | Deutsches Literatur-Lexikon.<br>Das Mittelalter.<br>Autoren und Werke nach<br>Themenkreisen und Gattungen | Das wissensvermittelnde Schrifttum bis zum Ausgang<br>des 14. Jahrhunderts | Achnitz, Wolfgang | 978-3-598-24996-9 | 28.08.2014 |
| 7 | Deutsches Literatur-Lexikon.<br>Das Mittelalter.<br>Autoren und Werke nach<br>Themenkreisen und Gattungen | Das wissensvermittelnde Schrifttum im 15. Jahrhundert                      | Achnitz, Wolfgang | 978-3-11-036193-3 | 14.08.2015 |
| 8 | Deutsches Literatur-Lexikon.<br>Das Mittelalter.<br>Autoren und Werke nach<br>Themenkreisen und Gattungen | Nachträge, Chronologie und Register                                        | Achnitz, Wolfgang | 978-3-598-24997-6 | 07.03.2016 |
